# Supplementary material for: Practice-Based Versus Telemedicine-Based Collaborative Care for Depression in Rural Federally Qualified Health Centers: A Pragmatic Randomized Comparative Effectiveness Trial
Source: Atypon-hosted journal article supplement (doi:10.1176/appi.ajp.2012.12050696), 2013-02-22

**Consort Diagram for a a Randomized Study of Practice-Based or Telemedicine-Based Collaborative Care**

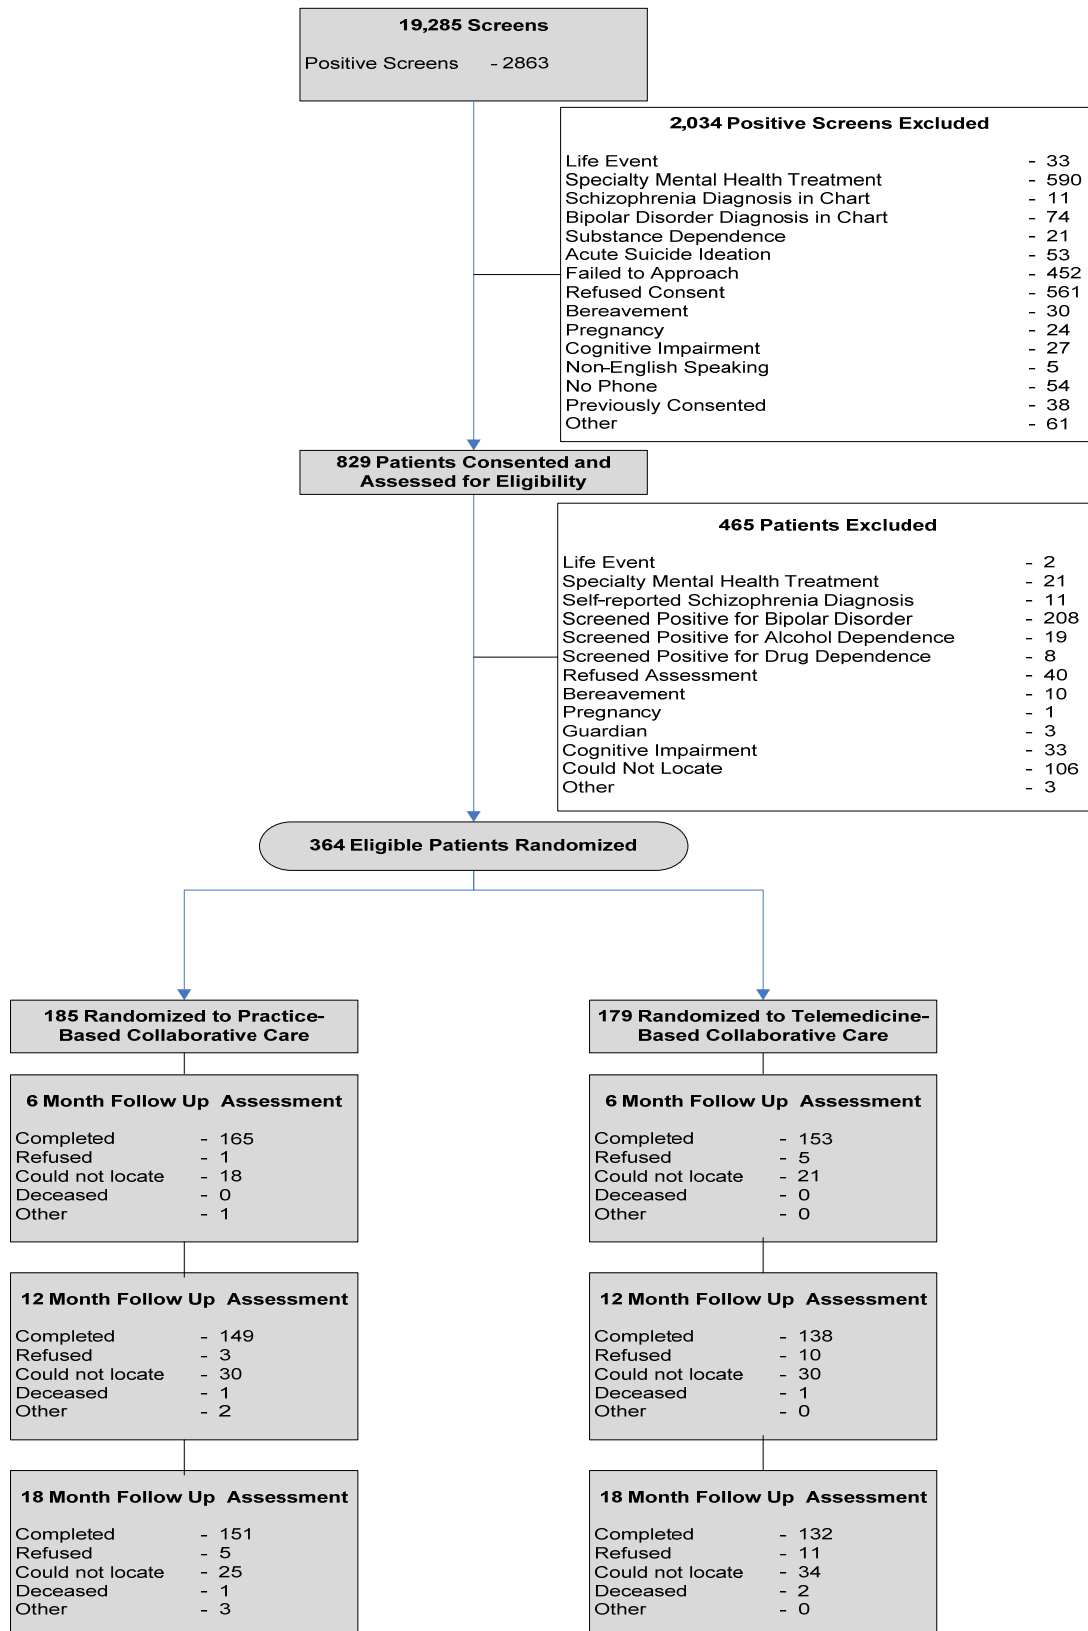

Supplement: 414_ds001.pdf [file 414_ds001.pdf]
